# Supplementary material for: Photoactive chemosensors 3 : a unique case of fluorescence enhancement with Cu(ii)
Source: Royal Society of Chemistry journal article supplement (doi:10.1039/b209053h), 2002-01-01
Supplement: b209053h.doc [file b209053h.doc]

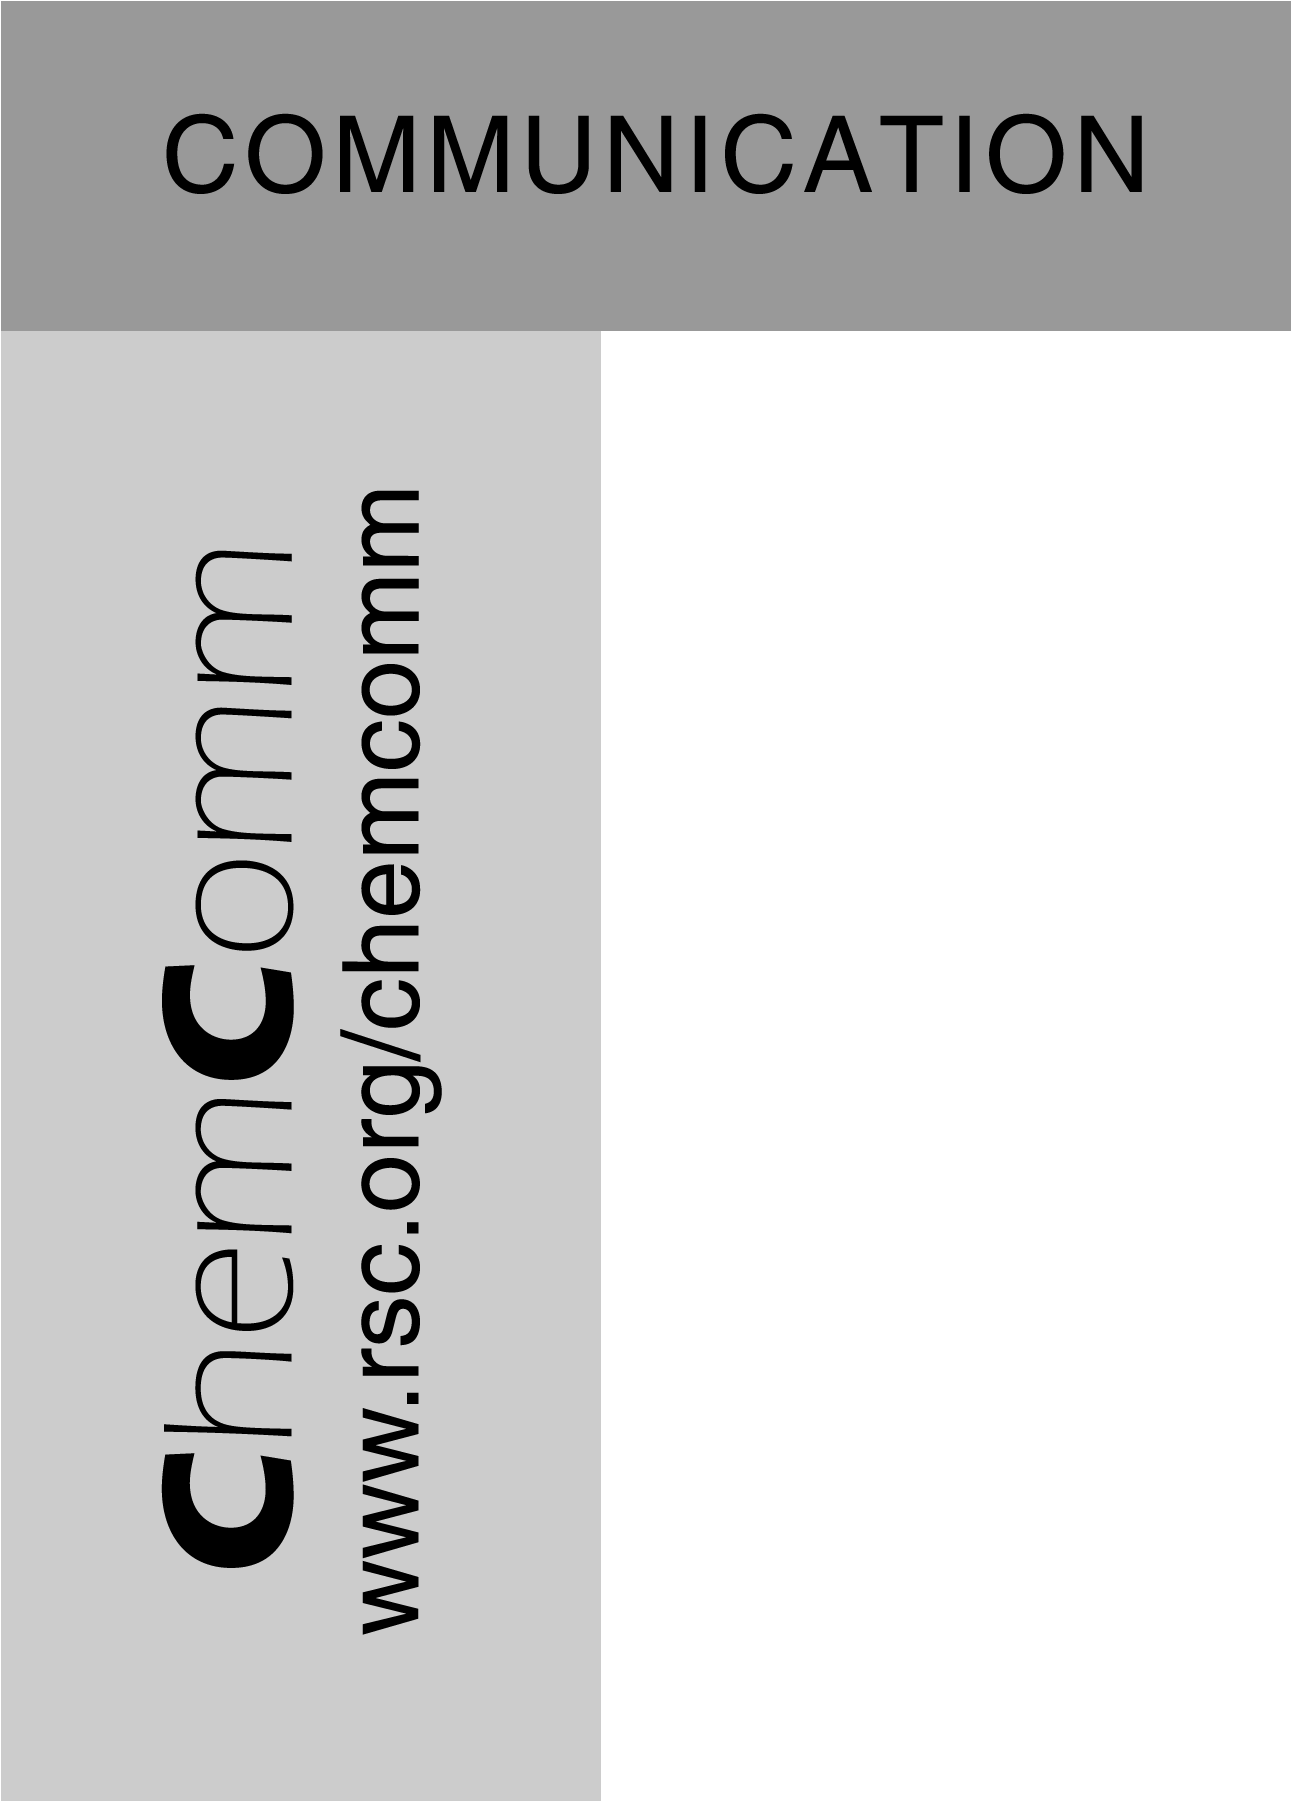
 Photoactive chemosensors 3 : a unique case of fluorescence s enhancement with Cu(II)

Sukhdeep Kaur and Subodh Kumar*

Department of Chemistry, Guru Nanak Dev University, Amritsar - 143 005, India.

e-mail: subodh.kumar@angelfire.com

# Supporting Information

# Synthetic Methodology and Characterization of Compounds

# Photophysical Information

# pH titration

# Fluorescence measurements

# Absorption measurements

# Stoichiometric determination

# 1. Synthetic Methodology and Characterization of Compounds

**General procedure of synthesis:**

**Synthesis of 2**

A mixture of 0.01mole of RCH2X **1** and 0.04 mole of diethanolamine containing 0.01 mole of K2CO3 was stirred at room temperature in CHCl3. After completion of reaction (tlc, 4-6hrs), the reaction mixture was washed thricewith water and the organic layer was dried over Na2SO4(anhyd.). The solvent was distilled off and the crude product was purified by column chromatography to isolate **2**.

**Synthesis of 3**

0.03 mole of SOCl2 was added slowly to 0.01 moles of **2** taken in dry CHCl3 (2-3ml) and the solution was stirred at room temperature for 1 hr. Then heated the reaction mixture for 15 min at 60 °C. Excess SOCl2 and CHCl3 was removed under vacuum to get dichloride **3**.

# Synthesis of 4

# A mixture of 3 (0.01 mole), 2-aminothiophenol (0.022mole), K2CO3 (0.022 mole) and TBA HSO4(10mg) (phase transfer catalyst) taken in DMF was stirred at room temperature under N2 atmosphere. After completion of reaction (tlc, 6-9hrs), the solid suspension was filtered off and washed twice with ethyl acetate. The solvent was removed under vacuum and the crude product was column chromatographed to isolate 4.

**(2a):** W. Wang, G. Springsteen, S. Gao, B. Wang, *J. Chem. Soc. Chem. Commun*., 2000, 1283

(**3a**) : (85%); m. p. 136-138 ºC; MS m / z 331(M+)333, 335; 1H nmr(CDCl3):  3.024 (t, *J* = 6.8Hz, 4H, 2xCH2N), 3.410( t, *J* = 6.8Hz, 4H, 2xCH2Cl),4.698(s, 2H, CH2), 7.479 (M, 4H, ArH), 7.993 (dd, *J1* = 7.8Hz *J2*= 1.9Hz, 2H, 2xArH) 8.440(m, 3H, ArH).

**(4a)** : (70%); thick liquid (dark yellow); MS m / z 509(M+); 1H nmr(CDCl3):  2.760(s, 8H, 2x-SCH2CH2N-), 4.119(bs, 4H, 2xNH2), 4.60 (s, 2H, CH2), 6.514(t, *J* = 7.6Hz, 2H, ArH), 6.569(d, *J* = 7.6Hz, 2H, ArH), 7.009(d, *J* = 7.6Hz, 2H, ArH), 7.082(t, *J* = 7.6Hz, 2H, ArH), 7.257-7.517(m, 4H, ArH), 7.991(d, *J* = 7.5Hz, ArH), 8.402(s, 1H, ArH), 8.4674(d, *J* = 8.3Hz, 2H, ArH); 13C nmr (normal / DEPT-135) (CDCl3):  32.932(-ve, CH2) , 51.407(-ve, CH2), 53.859(-ve, CH2), 115.188(+ve, ArCH), 117.979(ab, ArC), 118.781(+ve, ArCH), 125.310(+ve, ArCH) 125.476(+ve, ArCH), 126.137(+ve, ArCH), 128.164(+ve, ArCH), 129.435(+ve, ArCH), 129.843(+ve, ArCH), 131.690(ab, ArC), 131.791(ab, ArC), 135.806(+ve, ArCH), 148.493(ab, ArC); IR max (cm-1): 3261, 3369 (doublet, NH2 ).

**(2b)** : liquid (92%), MS m/z 195 (M+); 1H nmr (CDCl3):  1.992(bs, 2H, 2xOH), 2.727(t, J = 5.4Hz, 4H, 2xNCH2),3.635(t, J = 5.4Hz 4H, 2xCH2OH), 3.711(s, 2H, CH2), 7.284 – 7.347(m, 5H, ArH); 13C( normal):  55.76, 59.21, 59.58, 127.28, 128.47, 129.05, 138.71.

**(3b)**: (95%) m.p. 141-143 °C, MS m/z 231 (M+), 233, 235; 1H nmr (CDCl3): 3.499(t, J = 6.4Hz, 4H, 2xNCH2),4.064(t, J = 6.4Hz 4H, 2xCH2Cl), 4.405(s, 2H, CH2), 7.488 – 7.519 (m, 3H, ArH), 7.650 – 7.697 (m, 2H, ArH); 13C (normal): 

**(4b):** thick liquid (67%), MS m/z 409 (M+); 1H nmr (CDCl3):  2.595 – 2.674(m, 4H, 2xCH2S), **2.724** – 2.803(m, 4H, 2xCH2N), 3.562(s, 2H, CH2), 4.270(bs, 4H, 2xNH2), 6.572 – 6.661(m, 4H, ArH) 7.066(dt, J1 = 7.4Hz, J2 = 1.5Hz, 2H, ArH), 7.218 – 7.271(m, 7H, ArH); 13C( normal):  32.33, 53.30, 58.19, 114.83, 117.70, 118.42, 126.99, 128.22, 128.86, 129.56, 135.65, 138.77, 148.25.

**(2c)** : liquid (85%), MS m/z 209 (M+); 1H nmr (CDCl3):  2.064(bs, 2H, 2xOH), 2.707(t, J = 5.3Hz, 4H, 2xNCH2),2.782 – 2.829(m, 4H, CH2CH2Ph), 3.561(t, J = 5.3Hz 4H, 2xCH2OH), 7.187 – 7.352(m, 5H, ArH); 13C( normal):  33.28, 55.84, 56.30, 59.48, 126.14, 128.69, 129, 140.11.

**(3c)**: thick liquid (89%), MS m/z 245 (M+), 247, 249; 1H nmr (CDCl3): 3.413 – 3.605(m, 8H, CH2(CH2)N(CH2)2Ph), 4.088(t, J = 6.4Hz 4H, 2xCH2Cl), 7.229 – 7.357(m, 5H, ArH); 13C( normal): 

**(4c)** : thick liquid (73%), MS m/z 423 (M+); 1H nmr (CDCl3):  2.640 – 2.814(m, 12H, (2xSCH2CH2)NCH2CH2Ph),4.301(bs, 4H, 2xNH2) 6.683(t, J = 7.6Hz 4H, ArH) 7.070– 7.266(m, 7H, ArH), 7.066(d, J = 7.6Hz, 2H, ArH),); 13C( normal):  31.99, 33.24, 53.19, 55.55, 114.92, 117.31, 118.42, 126.06, 128.37, 128.72, 129.78135.87, 139.34, 148,45.

**(2d)** : liquid (88%), MS m/z 217 (M+); 1H nmr (CDCl3): t, J = 6.1Hz, 3H, CH3), 1.271(bs, 10H, (CH2)5CH3), 1.437(bm, 2H, CH2CH2CH2(CH2)4CH3), 1.823(bs, 2H, 2xOH), 2.542(t, J =7.4 Hz, 2H, NCH2CH2(CH2)5CH3), 2.681(t, J = 7.2Hz, 4H, 2xCH2N), 3.663(t, J = 5.6Hz 4H, 2xCH2OH); 13C( normal):  14.13, 22.68, 26.82, 27.41, 29.33, 29.55, 31.66, 54.81, 56.06, 59.54.

**(3d)** (95%) m.p. 123-124 °C, MS m/z 253(M+), 255, 257; 1H nmr (CDCl3): t, J = 6.0Hz, 3H, CH3), 1.280 – 1.350(m, 10H, (CH2)5CH3), 1.859(bm, 2H, CH2CH2CH2(CH2)4CH3), 3.205(t, J =7.6 Hz, 2H, NCH2CH2(CH2)5CH3), 3.496(t, J = 7.2Hz, 4H, 2xCH2N), 4.068(t, J = 6.6Hz 4H, 2xCH2Cl); 13C( normal):  14.13, 22.62, 23.10, 26.67, 29.02, 29.07, 31.69, 53.91, 54.22.

**(4d)** : liquid (64%), MS m/z 431 (M+); 1H nmr (CDCl3): t, J = 6.2Hz, 3H, CH3), 1.228(bs, 12H, (CH2)6CH3), 2.542(t, J =5.6 Hz, 2H, NCH2CH2(CH2)5CH3), 2.573 – 2.644(m, , 4H, 2xCH2S), 2.718 – 2.783(m, 4H, 2xCH2N), 6.630 – 6.720( m, 4H, ArH), 7.110(t, J = 7.8Hz, 2H, ArH), 7.345(d, 7.6Hz, 2H, ArH); 13C( normal):  14.07, 2.60, 26.80, 27.31, 29.21, 29.42, 31.78, 32.18, 53.30, 53.80, 114.81, 118.35, 129.58, 135.70, 148.31.

## 2. Photophysical Information

1. **pH titration**

The effect of pH on the fluorescence intensity of the fluoroionophore **4a** was investigated at 1x10-5M solution of **4a** prepared in CH3CN : H2O (4:1 v / v). The whole range of pH was tested by excitation at 365 nm and the emission was recorded at 465 nm.

# (b) Fluorescence measurements

Solutions containing 4a(10M), 1000M and various concentrations of copper nitrate (1M to 100M) were prepared in CH3CN: H2O (4:1 v / v) at pH 7( HEPES 10mM ). For interference evaluation, the solutions containing 4a(10M), one of the interfering metal ions [Ni(II), Cd(II), Zn(II), Ag(I), Hg(II), K(I)( 1000M)] and (1, 2, 4, 6, 8, 10M) of copper nitrate in CH3CN:H2O ( 4:1 v / v ) at pH 7( HEPES 10mM ) were prepared. The solutions were kept at 25+1 ºC for 3 h and were shaken occasionally and their fluorescence spectra were recorded.

**Spectrofluorophotometric titration of 4a with Cu(II)**

[4a] = 10-5M [Cu(II)] = 10-6M - 5X10-5M

pH = 7(HEPES 10mM)

**(c) Absorption Measurements**

Solutions containing 4a(100M and various concentrations of copper nitrate(10M to 1000M) were prepared in CH3CN:H2O ( 4:1). For interference evaluation, the solutions containing 4a(100M), one of the interfering metal ions [Ni(II), Cd(II), Zn(II), Ag(I), Hg(II), Na(I) K(I)( 10000M)] and (20, 60, 100, 150, 200, 250, 300M) of copper nitrate in CH3CN:H2O( 4:1) were prepared. The solutions were kept at 25+1 ºC for 3 h and were shaken occasionally and their absorption spectra were recorded.

**Spectrophotometric titration of 4a with Cu(II)**  Absorption is measured at 405 nm

[4a] = 10-4M [Cu(II)] = 10-5M - 6X10-4M

**3. Determination of stoichiometry**#

[4a] = 10-4M

[Cu(II)] =10-4M

Mixtures of **4a : Cu (II)** were prepared ( as 1:9, 2:8, 3:7, 4:6, 5:5, 6:4, 7:3, 8:2, 9:1 ) and their absorption spectra were recorded. The complex was formed between 400-540nm. For stoichiometric determination the absorption was observed at 405 nm.

**Job’s plot**

L:M abs. at 405nm

| 1:09 | 0.025 |
| --- | --- |
| 2:08 | 0.048 |
| 3:07 | 0.075 |
| 4:06 | 0.083 |
| 5:05 | 0.089 |
| 6:04 | 0.077 |
| 7:03 | 0.06 |
| 8:02 | 0.055 |
| 9:01 | 0.043 |

From the plot the stoichiometry is found to be 1:1 ( L:M)

**#** : W.C. Vosburgh and G. R. Cooper, J. Am. Chem. Soc., 1941, **63**, 437.
