# Supplementary figures and images for: Photoactive chemosensors 3 : a unique case of fluorescence enhancement with Cu(ii)
Source: Royal Society of Chemistry journal article supplement (doi:10.1039/b209053h), 2002-01-01

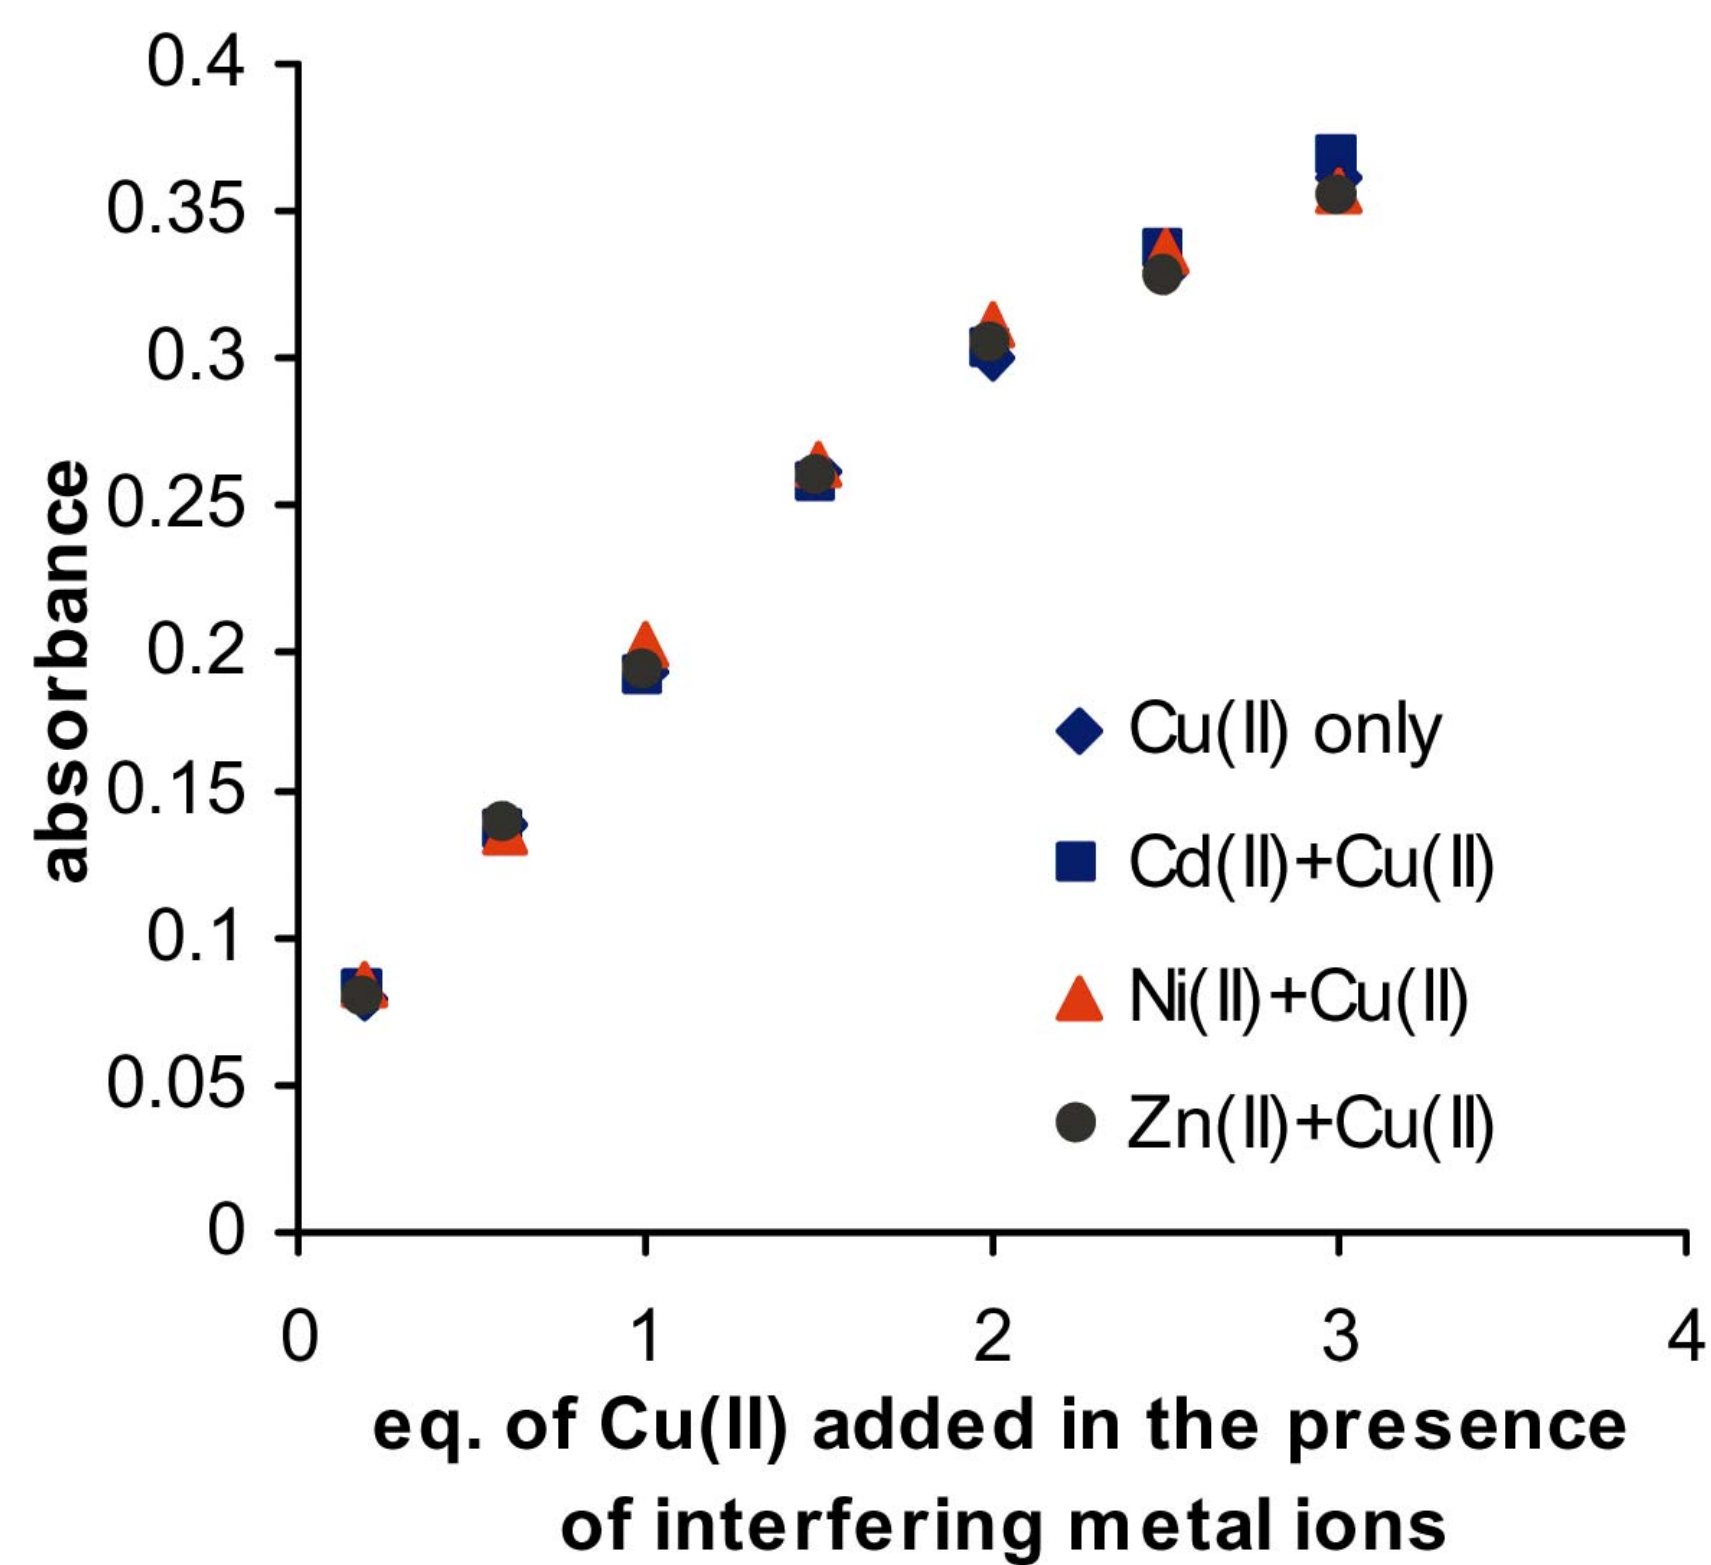

Supplement: b209053h.pdf [file b209053h.pdf]
